1 **Integrating thermodynamic and enzymatic constraints into genome-scale**  
2 **metabolic models**

3

4 Xue Yang<sup>a,b,1</sup>, Zhitao Mao<sup>a,1</sup>, Xin Zhao<sup>a,b</sup>, Ruoyu Wang<sup>a</sup>, Peiji Zhang<sup>a</sup>, Jingyi Cai<sup>a</sup>,  
5 Hongwu Ma<sup>a,\*</sup>

6

7 <sup>a</sup> Biodesign Center, Key Laboratory of Systems Microbial Biotechnology, Tianjin  
8 Institute of Industrial Biotechnology, Chinese Academy of Sciences, Tianjin, 300308,  
9 China.

10 <sup>b</sup> University of Chinese Academy of Sciences, Beijing, 100049, China.

11

12 <sup>1</sup> These authors contributed equally to this work.

13 \* [ma\\_hw@tib.cas.cn](mailto:ma_hw@tib.cas.cn)

14

15 **Abstract**

16 Stoichiometric genome-scale metabolic network models (GEMs) have been widely  
17 used to predict metabolic phenotypes. In addition to stoichiometric ratios, other  
18 constraints such as enzyme availability and thermodynamic feasibility can also limit  
19 the phenotype solution space. Extended GEM models considering either enzymatic or  
20 thermodynamic constraints have been shown to improve prediction accuracy. In this  
21 paper, we propose a novel method that integrates both enzymatic and thermodynamic  
22 constraints in a single Pyomo modeling framework (ETGEMs). We applied this  
23 method to construct the EcoETM, the *E. coli* metabolic model iML1515 with  
24 enzymatic and thermodynamic constraints. Using this model, we calculated the  
25 optimal pathways for cellular growth and the production of 22 metabolites. When  
26 comparing the results with those of iML1515 and models with one of the two  
27 constraints, we observed that many thermodynamically unfavorable and/or high  
28 enzyme cost pathways were excluded from EcoETM. For example, the synthesis  
29 pathway of carbamoyl-phosphate (Cbp) from iML1515 is both thermodynamically  
30 unfavorable and enzymatically costly. After introducing the new constraints, the  
31 production pathways and yields of several Cbp-derived products (e.g. L-arginine,  
32 orotate) calculated using EcoETM were more realistic. The results of this study  
33 demonstrate the great application potential of metabolic models with multiple  
34 constraints for pathway analysis and phenotype predication.

35

36 **Key words:**

37 Genome-scale metabolic network models, thermodynamics, enzymatic constraints,  
38 *Escherichia coli*, pathway feasibility

39

40 **1. Introduction**

41 Constraint-based metabolic network modeling is a mathematical framework used to  
42 analyze the feasible metabolic flux solution space through constrained optimization  
43 methods (Bordbar et al., 2014). It has been widely used in genome-scale metabolic  
44 network analysis to calculate the optimal synthesis pathways, as well as predict  
45 growth phenotypes and modification targets for metabolic engineering or disease  
46 treatment (Kim et al., 2012). Initially, only stoichiometric constraints and reaction  
47 reversibility constraints were considered in a classical method called flux balance  
48 analysis (FBA) (Orth et al., 2010). With the accumulation of enzyme kinetics data and  
49 the availability of high-throughput omics data, it has become possible to incorporate  
50 these data into the models to add boundary constraints for individual reactions or a  
51 summarized constraint of enzyme resources (Liu et al., 2014). In 2007, the FBAwMC  
52 model was constructed by introducing constraints of enzyme resources based on a  
53 fixed cell volume (Beg et al., 2007). Subsequently, other integration methods of  
54 protein resources were developed (Yang et al., 2018). There are two major trends in  
55 the development of resource allocation models. One is the MOMENT (Adadi et al.,  
56 2012) type models with only enzymatic constraints on the basis of GEMs, while the  
57 other is ME (Lloyd et al., 2018) type models with more detailed description of cellular  
58 processes, such as transcription and translation. In 2017, Sanchez et al. reported  
59 GECKO (GEMs with Enzymatic Constraints using Kinetic and Omics data) method  
60 and applied it in the construction of an enzymatic constraints model of  
61 *Saccharomyces cerevisiae* (Sanchez et al., 2017). This method was soon extended and  
62 applied in the construction of enzymatic constraints GEMs (ECGEMs) of other  
63 species (Bekiaris and Klamt, 2020; Massaiu et al., 2019). By integrating  $k_{cat}$   
64 parameters for individual enzymes and total enzyme amount constraints, these models  
65 can improve the simulation and prediction of biological phenomena, such as overflow

66 metabolism (Molenaar et al., 2009) and pathways switching (Chen and Nielsen,  
67 2019).

68 In FBA models, certain reactions are set as irreversible by considering the  
69 thermodynamic feasibility by introducing a zero-value constraint on upper/lower  
70 bounds of a reaction. However, there are no clear criteria to determine whether a  
71 reaction should be reversible or not, and reactions that are thermodynamically feasible  
72 by themselves can form thermodynamically unfavorable pathways such as unlimited  
73 ATP generation loops (Yuan et al., 2017). To address this problem, methods  
74 combining thermodynamic constraints with GEMs have been developed to improve  
75 the prediction accuracy (Soh and Hatzimanikatis, 2010). In 2007, Henry et al.  
76 integrated thermodynamic constraints into the FBA calculation process and proposed  
77 the TFMA method (Henry et al., 2007). Recently, Salvy et al. developed this method  
78 into the pyTFA and matTFA toolkits (Salvy et al., 2019) and applied it to phenotypic  
79 analysis in combination with the ME model (Salvy and Hatzimanikatis, 2020).  
80 Reliable data on thermodynamic parameters of reactions is particularly important for  
81 models with thermodynamic constraints (Du et al., 2018; Noor et al., 2012). In 2011,  
82 Flamholz et al. developed the eQuilibrator, a biological thermodynamics calculator  
83 that enables users to easily obtain thermodynamic parameters (Flamholz et al., 2012).  
84 In 2014, Noor et al. introduced the concept of Max-min Driving Force (MDF) to  
85 predict and optimize the thermodynamic bottleneck reactions in a pathway, and  
86 integrated this function into the eQuilibrator website as a free tool (Noor et al., 2014).  
87 Based on these studies, Hadicke et al. proposed the optMDFpathway method, which  
88 can directly identify the optimal MDF (and hence the most thermodynamically  
89 feasible) pathways in GEMs (Hadicke et al., 2018). Different from some workflows  
90 such as Poppy (Asplund-Samuelsson et al., 2018), which requires defining the  
91 pathway in advance and then evaluating its thermodynamic driving force, the  
92 optMDFpathway method integrates the objects of MDF into the FBA solution process  
93 and can therefore be directly applied to GEMs.

94 In this paper, we propose a novel method that integrates both enzymatic and  
95 thermodynamic constraints into a single modeling framework, named ETGEMs. The

96 Python-based Pyomo modeling package (Hart et al., 2017; Hart et al., 2011) was used  
97 to integrate multiple objects and constraints to satisfy the different expectations of the  
98 optimal pathways, such as maximal yield, minimal enzyme cost and optimal  
99 thermodynamic driving force. We applied this method to construct EcoETM, an *E.*  
100 *coli* metabolic model with enzymatic and thermodynamic constraints based on the  
101 iML1515 model (Monk et al., 2017). The simulation results indicated that the new  
102 model can effectively reduce the solution space by excluding pathways that are  
103 thermodynamically unfavorable or have high enzyme costs exceeding the available  
104 resources. The integration of both thermodynamic and enzymatic constraints into a  
105 genome-scale metabolic network model, the ETGEMs modeling framework, can be  
106 applied to other organisms with available enzyme kinetics and reaction  
107 thermodynamics data. The code for the construction and analysis of the model is  
108 available at <https://github.com/tibbdc/ETGEMs>.

109

## 110 **2. Methods**

### 111 **2.1. Pretreatment of the initial model and data collection**

112 The *E.coli* iML1515 (Monk et al., 2017) model was selected as the initial model for  
113 the integration of constraints and the range of reactions set for the collection of kinetic  
114 parameters. All model construction and analysis was conducted using Python (version  
115 3.6.5). The “convert\_to\_irreversible” function in the Cobrapy toolkit (version 0.13.1)  
116 was used to split the reversible reactions, and an irre\_iML1515 model was formed.  
117 The newly divided reactions were named “original reaction ID\_reverse”. The final  
118 model contained 3375 one-way reactions, 663 of which were designated as  
119 “\_reverse”.

120 Collection of enzymatic parameters: The  $k_{cat}$  parameters are based on machine  
121 learning predictions from databases performed by Heckmann et al. (Heckmann et al.,  
122 2018). Among them, a small number of parameters were corrected in previous work  
123 according to biomass and product synthesis. The protein subunit composition and  
124 molecular weight data were downloaded from the EcoCyc database  
125 (<https://ecocyc.org/>) (Karp et al., 2018). The value of total enzyme amount (e\_pool),

126 0.228 g/gDW, was calculated based on protein abundance data in the PAXdb database  
127 (<https://pax-db.org/>) (Wang et al., 2012) and intracellular protein content of g  
128 protein/gDW (Bremer H and P, 1996). An average enzyme saturation value ( $\sigma$ ) of 0.5  
129 was used based on previous studies (Bennett et al., 2009; Sanchez et al., 2017). The  
130 calculation of the enzymatic parameters was reported in a separate paper in detail  
131 (<https://github.com/tibbdc/ECMpy>).

132 Collection of thermodynamic parameters: the biomass synthesis reactions (2) and  
133 transport reactions (Hadicke et al., 2018) (1420) and exchange reactions (361) were  
134 excluded first. Among the remaining 1592 reactions, we temporarily removed the 253  
135 “\_reverse” reactions. Therefore, the collection range of thermodynamic parameters  
136 was reduced to 1339 reactions. The Gibbs energies of reactions were downloaded  
137 from the eQuilibrator website (<http://equilibrator.weizmann.ac.il/download>). After  
138 matching KEGG (used in eQuilibrator) and BIGG (used in iML1515) reaction IDs  
139 and reaction directions, 586  $\Delta_r G_i^{\circ}$  parameters were determined. Then, by referring to  
140 Table S5 in previous research (Hadicke et al., 2018), another 145  $\Delta_r G_i^{\circ}$  parameters  
141 were added. In addition, 71  $\Delta_r G_i^{\circ}$  parameters were calculated using the eQuilibrator  
142 calculator after manually matching KEGG reaction IDs by unifying reaction equations  
143 (e.g. GLCS1: replacing “ADPglucose  $\rightleftharpoons$  ADP + Glycogen” with “ADPglucose +  
144 0.25 H<sub>2</sub>O  $\rightleftharpoons$  ADP + 0.25 Glycogen”) and metabolite names (e.g. MLTP1: replacing  
145 “Maltopentaose” with “Cellopentaose”). Besides, 123  $\Delta_r G_i^{\circ}$  parameters were  
146 estimated by referring to similar reactions that can be identified by the eQuilibrator  
147 calculator. Among the resulting 925 reactions, 232 reactions had corresponding  
148 “\_inverse” reactions, and we assigned the  $-\Delta_r G_i^{\circ}$  values to their “\_inverse” reactions.  
149 Finally, a total of 1157  $\Delta_r G_i^{\circ}$  values were obtained, and 435 reactions still lacked  
150  $\Delta_r G_i^{\circ}$  parameters. All  $\Delta_r G_i^{\circ}$  parameters are listed in Tables A-C (in Supplementary  
151 file2), and supplementary methods (in Supplementary file1). For the  $\Delta_r G_i^{\circ}$   
152 calculated using eQuilibrator, the ionic strength was set to 0.1 M and the pH was set  
153 to 7.5. The gas constant  $R$  was 8.31446 J mol<sup>-1</sup>K<sup>-1</sup> (Flamholz et al., 2012) and the  
154 temperature  $T$  was 310.15 K (37 °C), giving an  $RT$  value of 2.579 kJ/mol.

155

## 156 2.2. Setting the concentration range of metabolites

157 The concentration limits for all metabolites were set to 0.5  $\mu\text{M}$  as lower bound and  
 158 20 mM as upper bound (Bennett et al., 2009). The concentrations of  $\text{CO}_2$  and  $\text{O}_2$  were  
 159 more strictly bounded to be in the ranges from 0.1 - 100  $\mu\text{M}$  (Hadicke et al., 2018)  
 160 and 0.5 - 200  $\mu\text{M}$  (Baltazar Reynafarje et al., 1985; Murphy, 2009), respectively. The  
 161 concentration ratios for ATP:ADP, ADP:AMP, NAD:NADH, NADPH:NADP and  
 162  $\text{HCO}_3:\text{CO}_2$ , were respectively fixed to 10:1, 1:1, 10:1, 10:1 and 2:1, based on the  
 163 literature (Hadicke et al., 2018).

164

## 165 2.3. The principle of introducing constraints

166 Method for stoichiometric and flux balance constraint addition:

$$\mathbf{S} * \mathbf{r} = \mathbf{0} \quad (1)$$

$$r_{lb} \leq r_i \leq r_{ub} \quad (2)$$

167 where  $\mathbf{r}$  is the reaction flux, and  $\mathbf{S}$  represents the stoichiometric matrix  
 168 (Orth et al., 2010).

169 A concise method for enzymatic constraint addition (Bekiaris and Klamt, 2020):

$$e_i = \frac{r_i \cdot MW_i}{\sigma \cdot k_{cat,i}} \quad (3)$$

$$\sum_{i=1}^n \frac{r_i \cdot MW_i}{\sigma \cdot k_{cat,i}} \leq e_{pool} \quad (4)$$

170 where  $e_i$  is the enzyme cost of a reaction flux  $r_i$ ,  $MW_i$  is the molecular weight of  
 171 enzyme  $i$ , and  $\sigma$  represents the average saturation of all enzymes.

172 Method for thermodynamic constraint introduction:

$$\ln(C_{i,min}) \leq x_i = \ln(C_i) \leq \ln(C_{i,max}) \quad (5)$$

$$x_i - x_j = \ln(h) \quad (6)$$

$$r_i \leq z_i \cdot r_{ub} \quad (7)$$

$$Df_i + (1 - z_i) \cdot K \geq Df_{min} \quad (8)$$

$$Df_i = -\Delta_r G'_i = -(\Delta_r G_i^\circ + RT \cdot \mathbf{S}_i^T \cdot \mathbf{x}) \quad (9)$$

$$Df_i \geq Df_{min} \quad (10)$$

$$Df_{min} \geq 0 \quad (11)$$

$$B = \max(Df_{min}) \quad (12)$$

173

174 where  $h$  is the concentration ratio of metabolites  $C_i$  and  $C_j$ ,  $S_i^T$  is the transposed  
 175  $i$ -th reaction of the full stoichiometric matrix  $S$ . In order to realize the thermodynamic  
 176 constraints only for the reactions involved in the pathway ( $r_i > 0$ ), a binary variable  
 177  $z_i$  and a sufficiently large value  $K$  (Henry et al., 2007) must be introduced. In this  
 178 work, the value of  $K$  was defined as  $\max(Df_{i,max}) - \min(Df_{i,min})$ . Due to the  
 179 second law of thermodynamics, a pathway can only work if formula (11) is valid,  
 180 When calculating the maximal thermodynamic driving force for implementing the  
 181 MDF or optMDFpathway methods, it is necessary to set the lower bound of the  
 182 driving force  $Df_i$  as  $B$  and turn it into an objective function.

183

#### 184 2.4. Objective functions used in this work

185 Multiple objective functions were adopted in this work to calculate the optimal  
 186 pathways satisfying different constraints, as listed in Table 1. In addition, other  
 187 objective functions were also used for other analyses based on the constrained model,  
 188 such as calculating the variability of metabolite and enzyme concentrations to identify  
 189 the bottlenecks in the network. These objective functions are listed in Table 1 and  
 190 Table S1 (in Supplementary file1).

191

192 **Table 1** Major objective functions used in the modeling framework.

| Objects                               | Types                 | Constraints                                                                                    | Purposes                                                                |
|---------------------------------------|-----------------------|------------------------------------------------------------------------------------------------|-------------------------------------------------------------------------|
| $r_{biomass}$ OR $r_{product}$        | Maximize              | $r_{substrate, ub}$ , $epool$ , $x_i, lb$ , $x_i, ub$ , $h_i$ , $Df_{min}$                     | To solve the maximum synthesis rate $r_i$ of biomass or product.        |
| $x_i$                                 | Maximize and Minimize | $r_{substrate, ub}$ , $r_{product, lb}$ , $epool$ , $x_i, lb$ , $x_i, ub$ , $h_i$ , $Df_{min}$ | To calculate the variability of $C_i$ to find the limiting metabolite.  |
| $Df_i$                                | Maximize and Minimize | $r_{substrate, ub}$ , $r_{product, lb}$ , $epool$ , $x_i, lb$ , $x_i, ub$ , $h_i$ , $Df_{min}$ | To calculate the variability of $Df_i$ to find the bottleneck reaction. |
| $(r_i MW_i)/(\sigma k_{cat,i})$       | Maximize and Minimize | $r_{substrate, ub}$ , $r_{product, lb}$ , $epool$ , $x_i, lb$ , $x_i, ub$ , $h_i$ , $Df_{min}$ | To calculate the variability of enzyme usage to detect key enzymes.     |
| $sum [(r_i MW_i)/(\sigma k_{cat,i})]$ | Minimize              | $r_{substrate, ub}$ , $r_{product, lb}$ , $epool$ , $x_i, lb$ , $x_i, ub$ , $h_i$ , $Df_{min}$ | To calculate the minimum enzyme cost of pathways                        |

$B$  Maximize  $r_{substrate, ub}, r_{product, lb}$  To calculate the MDF of pathways  
 $epool, x_i, lb, x_i, ub, h_i$

---

193

## 194 **2.5. Tools for model construction and problem solving**

195 The Concrete model framework in the python-based Pyomo package (version 5.6.8)  
196 was adopted to solve the constrained optimization problem. Gurobi solver (version  
197 9.0.2) was used for the calculation of all the linear program (LP) and mixed integer  
198 linear program (MILP) problems formulated in this work (Gurobi Optimization and  
199 LLC, 2020).

200

## 201 **3. Results**

### 202 **3.1. The influence of different constraints on predicted growth rates**

203 In order to determine a proper  $K$  value for thermodynamic constraints according  
204 to equation (8), we analyzed the  $Df_i$  variability for all the 1157 reactions with  $\Delta_r G_i^\circ$   
205 parameters in the irre\_iML1515 model, and determined that a  $K$  value of 1249  
206 kJ/mol is appropriate. At the same time, 24 thermodynamically unfavorable reactions  
207 were obtained (Table D,  $\max Df_i < 0$ ). Therefore, the 24 reactions cannot form feasible  
208 pathways ( $Df_i \geq 0$ ) predicted by EcoTCM and EcoETM. However, the results of flux  
209 variability analysis (FVA) for the pathways with the maximum growth rate predicted  
210 by the iML1515 model showed that the two thermodynamically unfavorable reactions  
211 E4PD\_reverse (catalyzed by erythrose 4-phosphate dehydrogenase) and CBMKr  
212 (catalyzed by carbamate kinase) are involved in optimal pathways. Similarly, the two  
213 thermodynamically unfavorable reactions DXYLTD\_reverse (catalyzed by  
214 D-xylonate dehydratase) and CBMKr, are necessary for pathways leading to the  
215 maximum growth rate predicted by EcoECM. According to these results, the solution  
216 space of iML1515 and EcoECM can be reduced by adding thermodynamic constraints  
217 by only excluding individual thermodynamically unfavorable reactions.

218



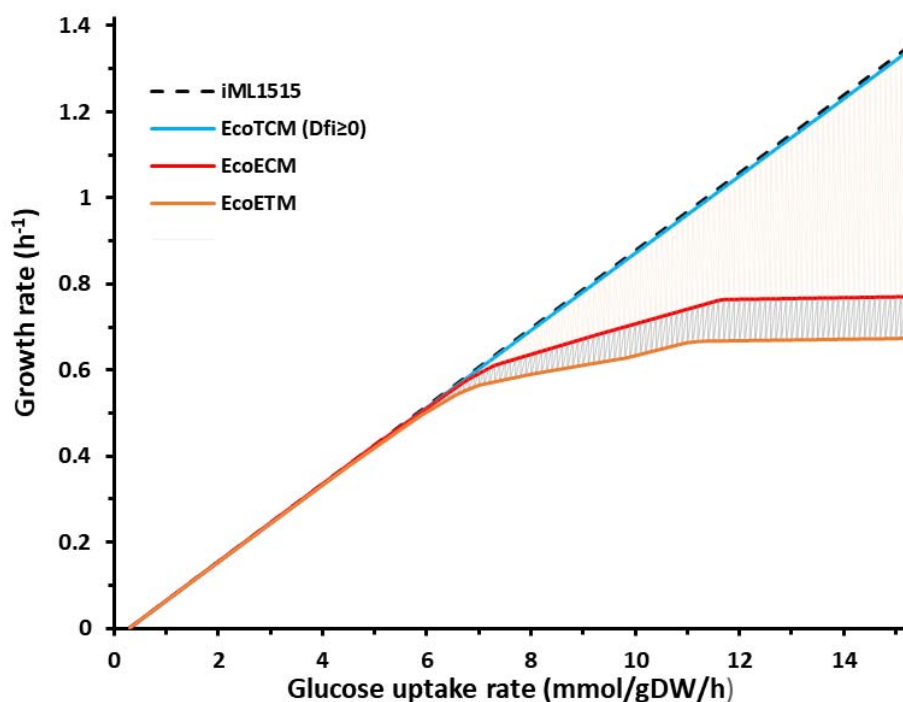

219

220 **Fig. 1. The maximum growth rates predicted by different models.** iML1515 model  
221 (black dotted line); EcoTCM (blue line); EcoECM (red line) and EcoETM (orange  
222 line).

223

224 Metabolic network models are often used to predict growth phenotypes and to  
225 detect product synthesis pathways (Trudeau et al., 2018; Yang et al., 2019). The  
226 integration of enzymatic and thermodynamic constraints into the GEMs is expected to  
227 produce more biologically feasible results by reducing the process of subsequent  
228 evaluation, screening and verification. Therefore, we further compared the optimal  
229 growth calculated based on the iML1515 model and the models integrating these two  
230 kinds of constraints separately and simultaneously. As shown in Fig. 1, integrating  
231 thermodynamic constraints alone (EcoTCM) does not have any apparent effect on the  
232 predicted growth rates, while enzymatic constraints had a more dramatic impact on  
233 the predicted growth rates. Furthermore, they also amplify the effect of the  
234 thermodynamic constraints as shown by the apparent differences between the results  
235 of EcoETM and EcoECM. This indicates that more thermodynamically unfavorable  
236 and enzyme costly pathways were excluded from the solution space by integrating

237 both constraints, resulting in more realistic pathway prediction. It should also be noted  
238 that the growth rates are mainly constrained by substrate availability at low substrate  
239 consumption rates. Therefore, the new constraints mainly affected the calculated  
240 optimal growth rates at higher substrate consumption rates.

241 To verify the thermodynamic feasibility of the pathways from the models, we  
242 calculated the MDF of pathways using the optMDFpathway method (Hadicke et al.,  
243 2018), which required preset growth rates. We gradually increase the expected rate of  
244 growth (by adjusting the lower bound of biomass synthesis reaction fluxes), and then  
245 solved the MDF of the pathways before and after adding constraints. In Fig. 2, the  
246 black dotted line indicates the maximum growth rate predicted by the iML1515 model  
247 when the glucose uptake rate is set at 10 mmol/gDW/h. On this basis, the  
248 optMDFpathway method was used to calculate the MDF distribution of biomass  
249 synthesis pathways. The results revealed that in the whole feasible space of growth  
250 rates (left side of the black dotted line), there is at least one thermodynamically  
251 feasible pathway ( $MDF \geq 0$ ) that can achieve the optimal thermodynamics ( $MDF =$   
252  $\max Df_i = 2.667$  kJ/mol). After introducing enzymatic constraints, the result showed a  
253 similar trend that the MDF of pathways decreased gradually with the growth rate, and  
254 the feasible space was reduced significantly, indicating that at high growth rates (such  
255 as  $\geq 0.63$  /h), a certain number of pathways satisfying the enzymatic constraints are  
256 not thermodynamically feasible.

257

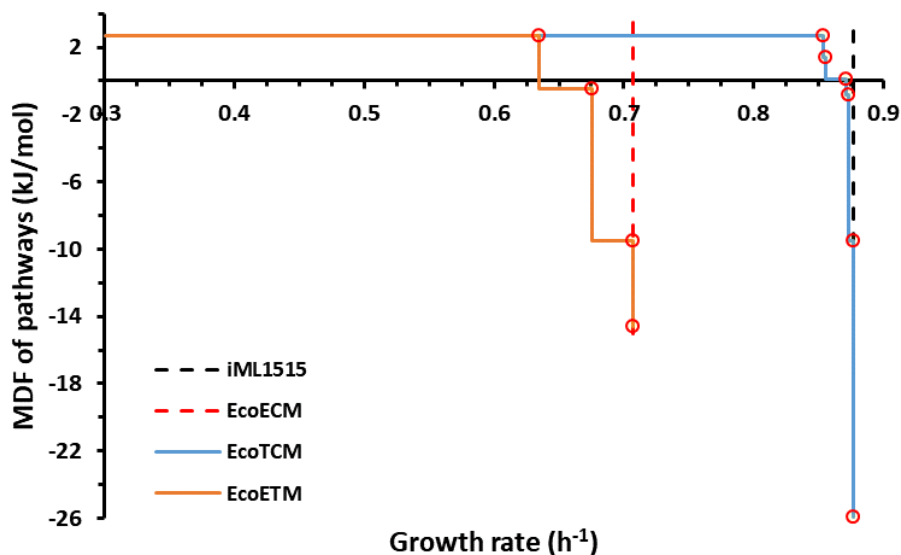

258

259 **Fig. 2. The optimal thermodynamic driving force (MDF) of biomass synthesis**  
260 **pathways under different constraints.** The maximum yields predicted by the  
261 iML1515 (black dotted line), EcoTCM (blue line), EcoECM (red dotted line) and  
262 EcoETM (orange line) models are shown. The points where the MDF suddenly  
263 changes are circled in red.

264

### 265 3.2. Analysis of bottleneck reactions, limiting metabolites and key enzymes

266 One application of MDF is to identify the bottleneck reactions and limiting  
267 metabolites, which in turn can help propose specific targets for pathway control and  
268 optimization (Dash et al., 2019; Yang et al., 2019). On the other hand, ECGEM can  
269 predict the optimal enzyme distribution, and thus discover the key enzymes in a  
270 pathway as engineering targets (Zheng et al., 2017). As both the bottleneck reactions  
271 and key enzymes depend on specific conditions (Trondle et al., 2020), we selected ten  
272 turning points (Fig. 2, circled in red) to illustrate the analysis method of bottleneck  
273 reactions, limiting metabolites and key enzymes in the ETGEMs framework and to  
274 explore the possible reasons for the reduction of solution space by different  
275 constraints in detail.

276 Specifically, we fixed the growth rate at the maximum value that can meet a MDF  
277 (B value), and then performed  $Df_i$  variability analysis for the reactions constrained by  
278 thermodynamics. Hence, we calculated the  $\max Df_i$  and  $\min Df_i$  of every reaction.  
279 When both the growth rate and MDF are preset at maximum values, if the  $Df_i$  of a

280 reaction does not have variability ( $\Delta Df_i = \max Df_i - \min Df_i = 0$ ) and is equal to the  
281 B value, it is a bottleneck reaction (Hadicke et al., 2018). Then, the variability of  $x_i$ ,  
282 which characterizes the metabolite concentration and the variability of enzyme costs,  
283 was analyzed in the same way.

284 In the research of Hadicke et al., the reaction of CBMKr is thermodynamically  
285 unfavorable and its stoichiometric relationship is controversial, so the reaction CBPS  
286 catalyzed by carbamoyl-phosphate synthase was used to replace the CBMKr as the  
287 only way to synthesize Cbp. It should be noted that when CBMKr is allowed to  
288 participate in a pathway, the MDF of the pathway should be reduced to below -9.49  
289 kJ/mol (Table D), as mentioned above. Because the enzyme efficiency of CBPS is not  
290 considered in EcoTCM, the replacement will not have a particularly significant  
291 impact on the growth rate. Similarly, the fact that CBMKr is thermodynamically  
292 unfavorable is ignored in EcoECM, so it is allowed to participate in the biomass  
293 synthesis process. However, when considering both the thermodynamic and  
294 enzymatic constraints in EcoETM, CBMKr was excluded because of its poor  
295 thermodynamics, and the problem of low efficiency of CBPS (Guillou et al., 1992)  
296 was highlighted simultaneously. As shown in Table E (in Supplementary file2) and  
297 Table 2, the CBPS reaction had the highest enzyme cost due to poor kinetic  
298 parameters (accounting for 6.9% of the total enzyme cost of the whole pathway),  
299 indicating that the replacement of the two reactions actually has a significant impact  
300 on growth. It can be seen that the thermodynamic and enzymatic constraints offer two  
301 different perspectives on the control steps of a pathway, so the key reactions  
302 determined by the two approaches may be very different. Therefore, EcoETM can  
303 anchor the thermodynamic bottlenecks and enzymatic key steps of a pathway more  
304 effectively, which is conducive to the accurate and comprehensive optimization of a  
305 pathway.

306 In addition, the reaction TPI is also a crucial reaction from both the thermodynamic  
307 and enzymatic perspectives (Tables S2 and S4, in Supplementary file1). The higher  
308 enzyme usage caused by high flux indicates its importance in the biomass synthesis  
309 process. At the same time, it is a reversible reaction that is prone to reaching an

310 equilibrium state, and its product glyceraldehyde 3-phosphate (g3p) is also the  
 311 substrate of another bottleneck reaction, GAPD (Table F, in Supplementary file2).  
 312 Therefore, the concentration of g3p is strictly trapped. There is a close relationship  
 313 between bottleneck reactions and limiting metabolites, and the sharing of metabolites  
 314 among reactions is an important reason for the phenomenon of distributed bottleneck  
 315 reactions (Hadicke et al., 2018; Mavrovouniotis, 1993), which suggests that we need  
 316 to weigh the potential and comprehensive impact of bottleneck reactions when  
 317 developing an optimization strategy according to an optimal distribution of metabolite  
 318 concentrations.

319

320 **Table 2** Comparison of parameters for the two Cbp synthesis reactions

| Reaction ID | Reaction Equation                                                                       | $k_{cat}/MW$ (reverse)<br>$h^{-1} \cdot kDa^{-1}$ | $d_r G'^0$<br>kJ/mol | $Df_i$ range<br>kJ/mol |
|-------------|-----------------------------------------------------------------------------------------|---------------------------------------------------|----------------------|------------------------|
| CBPS        | 2.0 atp_c + gln__L_c + h2o_c + hco3_c --> 2.0 adp_c + cbp_c + glu__L_c + 2.0 h_c + pi_c | 54.13                                             | -13.4 ± 5.2          | -21.65 ~ 105.48        |
| CBMKr       | atp_c + co2_c + nh4_c <=> adp_c + cbp_c + 2.0 h_c                                       | 4179.36<br>(1221.59)                              | 19 ± 7.8             | -81.96 ~ -9.49         |

321

322 Pathway evaluation performed in previous studies (Trudeau et al., 2018; Yang et al.,  
 323 2019) indicated that although the theoretical maximum yield remains unchanged,  
 324 many pathways should still be excluded due to criteria related to enzyme kinetics and  
 325 thermodynamics. In section 3.1, the effect of thermodynamic constraints on reducing  
 326 the yield space was not always apparent in Fig. 1. Because the number of solutions is  
 327 more representative of the size of solution space than the maximum yield, the results  
 328 do not necessarily indicate that thermodynamic constraints play a dispensable role in  
 329 reducing the solution space. Based on this analysis, we can see that thermodynamic  
 330 constraints can screen feasible pathways by either 1) determining the  
 331 thermodynamically unfavorable reactions, thereby excluding all the pathways in  
 332 which they are necessary, such as CBMKr, DXYLTD\_reverse and E4PD\_reverse, or 2)  
 333 by eliminating reactions that are thermodynamically feasible in principle, but no  
 334 longer meet the criteria due to shared limiting metabolites, which lead to distributed

335 bottleneck reactions. For example, the simultaneous occurrence of PGCD, GAPD,  
336 FBA, PGK and TPI precludes the feasibility of biomass synthesis (Tables E-G in  
337 Supplementary file2).

338

### 339 **3.3. Analysis of products synthesis pathways using the four models**

340 To further investigate the phenotypic prediction differences between models with  
341 different constraints, we reanalyzed the pathways for the synthesis of 20 products  
342 with the highest yield from glucose used in another study (Hadicke et al., 2018). The  
343 prediction results of the iML1515 model show that Cbp is the product with the highest  
344 yield. Since Cbp is an essential precursor of L-arginine (L-Arg), we also calculated  
345 the yield of L-Arg and its other precursor, ornithine (Orn). As shown in Fig. 3A, the  
346 calculated optimal product synthesis rates from iML1515 for the 22 products all had  
347 linear relationships with the glucose uptake rate, and the synthesis rate of Cbp was  
348 much higher than those of other products. As shown in Fig. 3B, with the addition of  
349 thermodynamic constraints, the rate still increased linearly, but the synthesis rates for  
350 Cbp, Orot, Dhor\_S, Cbasp, Orot5p and L-Arg were lower than in iML1515 at the  
351 same glucose uptake rates (also shown for individual products in Fig. 4). By  
352 analyzing the MDF change curves of these products, we found that all the MDF  
353 values of the maximum yield pathways predicted by iML1515 were -9.49 kJ/mol  
354 (Figure B, in Supplementary file2) due to the participation of the bottleneck reaction  
355 CBMKr. This very low value indicated that CBMKr is thermodynamically  
356 unfavorable, and it was automatically excluded from the model with thermodynamic  
357 constraints, generating more realistic pathway predictions than the iML1515 model  
358 for Cbp-derived products such as Orot, Dhor\_S, Cbasp, Orot5p and L-Arg.

359

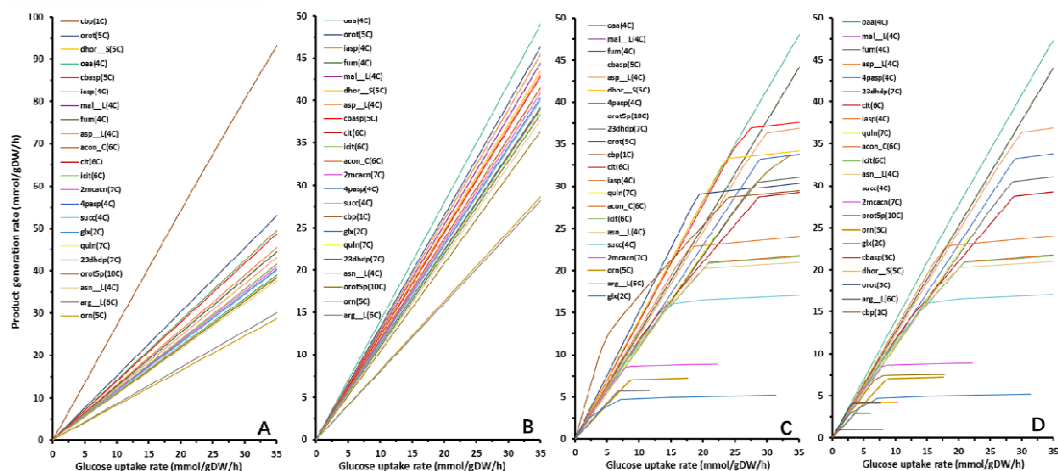

360

361 **Fig. 3. The simulation results of 22 product synthesis rates based on various**  
 362 **models. (A) iML1515; (B) EcoTCM; (C) EcoECM; (D) EcoETM.** The order of  
 363 names in the legend is the same as the order of the final values of the production  
 364 curves (from top to bottom). The molar amount of products was normalized based on  
 365 glucose (6 C-atoms).  
 366

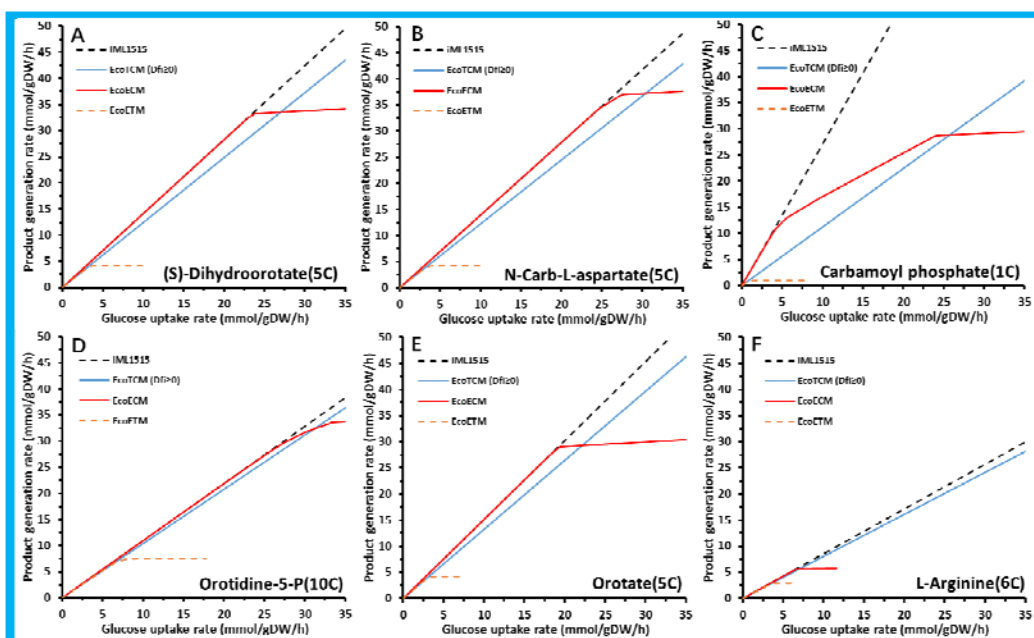

367

368 **Fig. 4. The predicted synthesis rates for various products by various models. (A)**  
 369 **(S)-Dihydroorotate (Dhor\_S); (B) N-Carb-L-aspartate (Cbasp); (C) Carbamoyl**  
 370 **phosphate (Cbp); (D) Orotidine-5-P (Orot5p); (E) Orotate (Orot); (F) L-Arginine**  
 371 **(L-Arg).** The molar amount of products was normalized based on glucose (6  
 372 C-atoms).  
 373

374 In addition to these Cbp-derived products, the calculated maximum rate of  
 375 oxaloacetate (Oaa) also decreased slightly (Figure A and Table H, in Supplementary

376 file2) in the models with thermodynamic constraints. After setting the Oaa synthesis  
377 rate at the maximum value predicted by iML1515 and solving the MDF of the Oaa  
378 synthesis pathway(s), an MDF of -0.632 kJ/mol was obtained (Figure B, in  
379 Supplementary file2). Then, by analyzing the  $Df_i$  variability, the three reactions  
380 FLDR2 (catalyzed by flavodoxin reductase), PFL (catalyzed by pyruvate formate  
381 lyase) and POR5\_reverse (catalyzed by pyruvate synthase) were identified as  
382 distributed bottlenecks (Mavrovouniotis, 1993). Due to the shared metabolites  
383 between the bottleneck reactions, the simultaneous participation of the three reactions  
384 would preclude the thermodynamic feasibility of Oaa biosynthesis ( $Df_i < 0$ ).

385 At low substrate uptake rates, the predicted synthesis rates are limited by substrate  
386 availability and there is no difference in the rates from iML1515 (Fig. 3A) and those  
387 from the enzyme constrained model (Fig. 3C). When the substrate uptake rate was  
388 increased, the rate curves in Fig. 3C began to turn, indicating that the enzyme  
389 availability starts to be a limiting factor, and the pathways with lower enzyme costs  
390 need to be enabled to satisfy the enzymatic constraints. The minimum enzyme cost of  
391 the optimal Cbp synthesis pathway calculated based on iML1515 was 65.63 mg  
392 /mmol glucose/h). With a total enzyme constraint of 0.228 g enzyme/gDW, the  
393 maximum rate of glucose uptake of this pathway was calculated to be 3.47  
394 mmol/gDW/h. Therefore, at glucose uptake rates above this value, this high enzyme  
395 cost pathway is gradually switched to new pathways with lower enzyme costs and  
396 lower yields (Fig. 3C). When the glucose uptake rate was set to 1 mmol/gDW/h, the  
397 Cbp synthesis flux was set to 15.67 mmol/gDW/h, and the total enzyme amount was  
398 set to 133.25 mg/gDW, the minimum enzyme cost of reactions in the pathway showed  
399 that AKGDH (catalyzed by 2-oxoglutarate dehydrogenase), GLCptspp (realized by  
400 the PTS system) and CBMKr were the three reactions with the highest enzyme cost,  
401 at 8.10, 5.50 and 3.75 mg/gDW, respectively. The main reasons for the high enzyme  
402 cost were the high protein molecular weight (AKGDH, 2418.39 kDa), low  $k_{cat}$  value  
403 (GLCptspp, 10.6 /s) and high flux demand (CBMKr, 15.67 mmol/mmol glucose),  
404 respectively.

405 As shown in Fig. 3D, due to the integration of both thermodynamic and enzymatic



406 constraints, the synthesis rate of some products decreased significantly. Cbp decreased  
407 from the highest rate predicted by the iML1515 model to the lowest one predicted by  
408 EcoETM, showing the combined effect of the two constraints on the feasibility of  
409 pathways and the great reduction of the solution space. By comparing Figs. 3A-D, it  
410 can be seen that the integration of thermodynamic constraints (Fig. 3B) and enzymatic  
411 constraints (Fig. 3C) did affect the prediction results of iML1515 (Fig. 3A) from  
412 different perspectives. At the initial stage of glucose uptake, thermodynamic  
413 constraints can change the yield and ranking order of product synthesis. When the  
414 glucose uptake rate reaches a specific level, the enzyme amount becomes the limiting  
415 factor, and the rate curves from EcoECM begin to show differences with those from  
416 the iML1515 model. After integrating the two constraints in one model, many  
417 unfavorable pathways were excluded from EcoETM, which led to a much smaller  
418 solution space and more precise prediction of pathways. For example, the maximal  
419 arginine synthesis rate of the thermodynamically feasible and low enzyme cost  
420 pathways is actually quite low (is 4.36 mmol/gDW/h at the maximum glucose uptake  
421 rate of 6 mmol/gDW/h) and significantly different from the results predicted by  
422 iML1515 (the carbon yield reduced by 43.1%, Fig. 4F).

423 The MDF change in Fig. 5 clearly shows the switching of pathways under  
424 thermodynamic constraints. Due to the participation of CBMKr, the MDF suddenly  
425 drops in the synthesis process of Cbp (Fig. 5A), as well as its derivatives, such as  
426 L-arginine (Fig. 5B). As can be seen in Fig. 5C, although there is no  
427 thermodynamically unfavorable reaction in the Oaa synthesis pathway, the  
428 simultaneous occurrence of 3 distributed bottleneck reactions, FLDR2, PFL and  
429 POR5\_reverse, nevertheless precludes the thermodynamic feasibility of the pathway.  
430 It should be noted that by adjusting the threshold of MDF, i.e. by introducing a strong  
431 thermodynamic constraint such as increasing the MDF threshold from 0 to 1 kJ/mol  
432 (Trudeau et al., 2018), more pathways can be excluded from the solution space,  
433 allowing the prediction of more thermodynamically feasible pathways (Fig. S1, in  
434 Supplementary file1). In addition, by comparing Figs. 5D and E, it can be seen that  
435 iML1515 and EcoTCM cannot distinguish the synthesis curves of citrate (Cit) and

436 isocitrate (Icit), while EcoECM (including EcoETM) can distinguish them. The  
437 synthesis of Icit from Cit requires an additional reaction catalyzed by aconitase  
438 (consisting of the two half-reactions ACONTa and ACON Tb in the model), so more  
439 enzyme is needed for the Icit synthesis process, leading to earlier pathway switching  
440 than for Cit. However, the two reactions are not thermodynamic barriers and there is  
441 no carbon and energy loss, so their production curves in EcoTCM and iML1515 are  
442 identical.

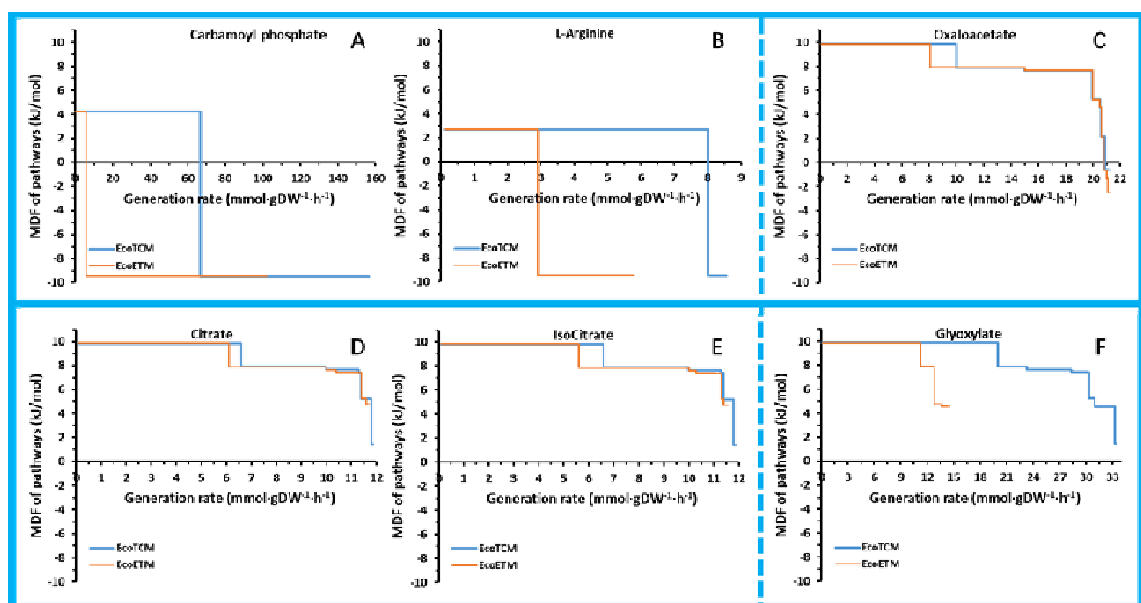

443  
444 **Fig. 5. The MDF of product synthesis pathways under different constraints. (A)**  
445 **Carbamoyl phosphate; (B) L-Arginine; (C) Oxaloacetate; (D) Citrate; (E) Isocitrate;**  
446 **(F) Glyoxylate.**

447  
448 To further investigate the differences of the predicted optimal pathways from  
449 iML1515 and EcoETM, we plotted the calculated L-Arg synthesis pathways from the  
450 two models with a glucose uptake rate of 3.64 mmol/gDW/h (the turning point at  
451 which the enzyme constraint becomes the limiting factor), as shown in Fig. 6. The  
452 L-Arg production rates at this point were 3.12 mmol/gDW/h based on iML1515 and  
453 2.90 mmol/gDW/h based on EcoETM. As can be seen in Fig. 6, the key difference is  
454 in the Cbp production part. In the pathway obtained from iML1515, the CBMKr  
455 reaction with high enzyme efficiency is used (Fig. 6A). By contrast, this reaction is  
456 not in the pathway from EcoETM because it is thermodynamically unfavorable, and

457 the CBPS reaction with low carbon yield and low enzyme efficiency is used instead  
 458 (Fig. 6B). This inevitably leads to high enzyme cost of the pathway and a small  
 459 maximal production rate, which was significantly lower than that predicted by  
 460 iML1515. This enzyme was therefore identified as an engineering target for  
 461 improving arginine production. In addition, through the  $Df_i$  variability analysis, we  
 462 also found a thermodynamic bottleneck reaction in the L-Arg synthesis pathway,  
 463 catalyzed by acetylglutamate kinase (ACGK, its  $\max Df_i$  is only 2.667 kJ/mol).  
 464 Furthermore, ACGK is also the thermodynamic bottleneck for biomass synthesis, as  
 465 described in 3.2 and 3.3. Its thermodynamic feasibility is likely to be highly  
 466 dependent on ADP depletion reactions, such as pyruvate kinase (Vogel and McLellan,  
 467 1970). Coupling between reactions is an important means to overcome the  
 468 thermodynamic bottleneck for the engineering practice (Zhang et al., 2017).  
 469

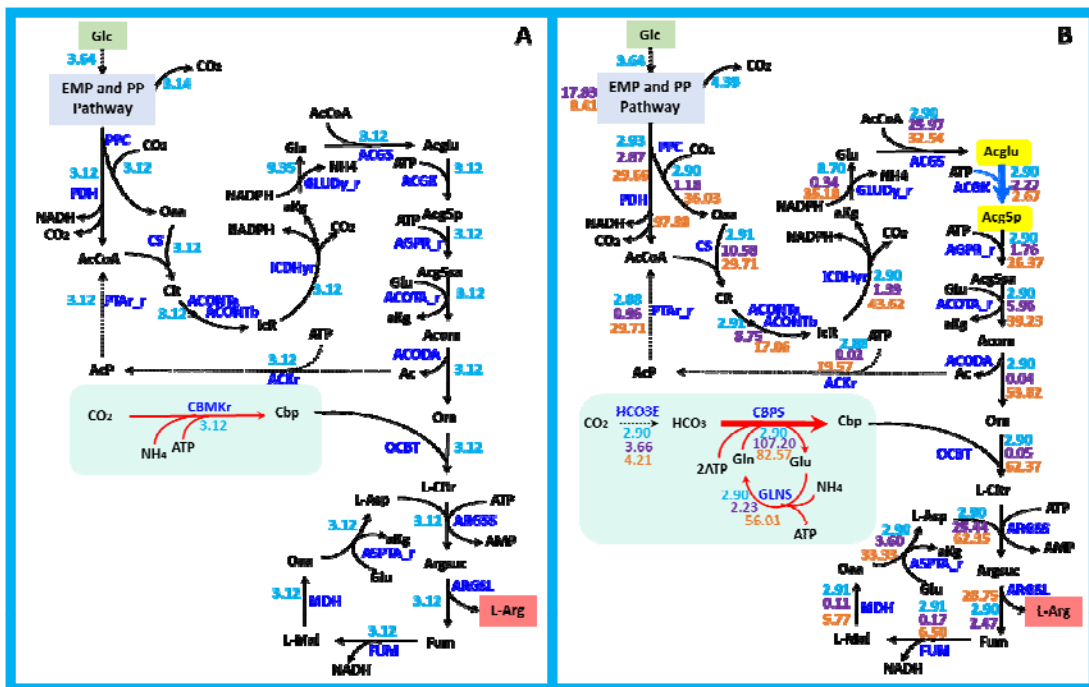

470  
 471 **Fig. 6. Prediction of the L-arginine synthesis pathway by iML1515 (A) and**  
 472 **EcoETM (B).** Shown are: the structural change of the pathway (light blue region); the  
 473 reaction with the highest enzyme cost (red thick arrow); the thermodynamic  
 474 bottleneck reaction (blue arrow); the limiting metabolite (yellow background); and the  
 475 simplified pathways of EMP and PP (navy-blue background). The unit of the flux  
 476 value is mmol/gDW/h (blue, on the top); the unit of the enzyme cost is mg/(mmol

477 glucose /h (purple, in the middle); and the unit of the maximum thermodynamic  
478 driving force is in kJ/mol (orange, at the bottom).

479

#### 480 **4. Discussion**

481 The development of ETGEMs benefits from the excellent biological basis and  
482 mathematical modeling foundation of ECGEMs (Adadi et al., 2012; Sanchez et al.,  
483 2017) and thermodynamic constraint models (Hadicke et al., 2018; Henry et al., 2007;  
484 Salvy et al., 2019). In ETGEMs, enzyme restriction leads to a decrease of the  
485 predicted maximum yield by excluding pathways with high enzyme costs.  
486 Accordingly, the cells have to switch to new pathways to satisfy the enzymatic  
487 constraint (Chen and Nielsen, 2019). The addition of thermodynamic constraints can  
488 not only limit the feasibility of pathways, but also optimize the thermodynamic  
489 feasibility of bottleneck reactions in the pathway by adjusting the concentration of  
490 metabolites, and predict the MDF for a pathway. With the addition of thermodynamic  
491 and enzyme constraints, ETGEMs strengthen the restriction of the feasibility of a  
492 pathway to allow more realistic pathway prediction. It can also be used to identify  
493 thermodynamic bottleneck reactions and low efficiency enzymes, and thus provide  
494 guidance for pathway engineering.

495 Computational methods have been used to systematically design novel pathways in  
496 recent studies. It is often necessary to screen pathways based on certain criteria to  
497 choose the most promising pathways for experimental verification (Trudeau et al.,  
498 2018; Yang et al., 2019). Pathway evaluation needs to integrate thermodynamic and  
499 kinetic standards directly in the GEMs. Therefore, by integrating the dual constraints  
500 into the GEMs, the thermodynamic and enzymatic cost of the pathway can be  
501 calculated. Taking the L-Arg synthesis pathway as an example, in addition to flux  
502 distribution, thermodynamic bottleneck reactions, limiting metabolites, enzyme cost  
503 distribution and key enzyme information are also given. Therefore, the ETGEMs, if  
504 combined with certain algorithms, are expected to be an effective tool for systematic  
505 pathway design. In addition, the integration of thermodynamic constraints in the  
506 reaction sets of a specified model can avoid the repetitive preparation of pathway  
507 information.

508 The values of parameters such as  $\Delta_r G_i^{\circ}$  and  $k_{\text{cat}}$  can greatly affect the prediction  
509 results of a constrained model. In the construction of EcoETM, some standard  
510 thermodynamic parameters were not successfully estimated due to the inconsistent  
511 names of metabolites or the lack of KEGG reaction IDs in the iML1515 model.  
512 Besides, in order to improve the coverage of the  $\Delta_r G_i^{\circ}$  parameters, some  
513 approximate  $\Delta_r G_i^{\circ}$  values were obtained by neglecting the groups in the metabolites  
514 that have not changed and do not have the evident role of thermodynamic promotion  
515 (e.g. GPDDA2: replacing “Glycero-3-phosphoethanolamine + H<sub>2</sub>O  $\rightleftharpoons$   
516 Ethanolamine + Glycerol 3-phosphate” with “Ethanolamine phosphate + H<sub>2</sub>O  $\rightleftharpoons$   
517 Ethanolamine + Orthophosphate”), by referring to similar reactions with the same  
518 group changes (e.g. GP4GH: replacing “GppppG + H<sub>2</sub>O  $\rightleftharpoons$  2 GDP” with “AppppA  
519 + H<sub>2</sub>O  $\rightleftharpoons$  2 ADP”), or by replacing the metabolites that cannot be evaluated with  
520 structural similarly metabolites (e.g. L\_LACD3: replacing “Menaquinone 8” with  
521 “Menaquinone”). This is a preliminary exploration of the possibility of parameter  
522 reference between the reactions due to the similarity of the involved compounds and  
523 changed groups. In fact, more accurate larger-scale enhancement of  $\Delta_r G_i^{\circ}$  parameter  
524 coverage will still depend on the resources of reactions and parameters available in  
525 databases such as eQuilibrator, TECRDB (Goldberg et al., 2004) and KEGG, as well  
526 as the combination of efficient methods, such as machine learning (Heckmann et al.,  
527 2018). Researchers have made efforts to calibrate parameters by referring to the yield  
528 and flux distribution of the biomass and product synthesis processes (Bekiaris and  
529 Klamt, 2020), or reasonably narrowing metabolite concentration ranges according to  
530 metabolomic data (He et al., 2020). The improvement of parameter accuracy and  
531 coverage will increase the prediction efficiency, reduce the cost of result evaluation,  
532 and contribute to the construction of powerful metabolic models of *E. coli* and other  
533 species.

534

## 535 **5. Conclusions**

536 In this work, we developed a novel functional modeling framework for  
537 genome-scale metabolic models with integrated enzymatic and thermodynamic

538 constraints, named ETGEMs. The pathway calculation results indicated that many  
539 thermodynamically unfavorable and enzymatically costly pathways were excluded by  
540 the new constraints, leading to more realistic pathway prediction. By comparing the  
541 pathways from different models, the thermodynamic and enzymatic bottlenecks in the  
542 pathways can be identified, providing new targets for directed evolution and  
543 metabolic engineering.

544

#### 545 **Acknowledgments**

546 This work was funded by the National Key Research and Development Program of  
547 China (2018YFA0900300, 2018YFA0901400); the International Partnership Program  
548 of Chinese Academy of Sciences (153D31KYSB20170121). We thank Elad Noor,  
549 Steffen Klamt, Axel von Kamp for providing more details about their work. We thank  
550 David Heckmann for sharing EC number file with us. We thank Dr. Chaoyou Xue in  
551 revising the manuscript.

552

#### 553 **References**

- 554 Adadi, R., Volkmer, B., Milo, R., Heinemann, M., and Shlomi, T., 2012. Prediction of  
555 microbial growth rate versus biomass yield by a metabolic network with kinetic  
556 parameters. *PLoS Comput. Biol.* 8, e1002575.
- 557 Asplund-Samuelsson, J., Janasch, M., and Hudson, E.P., 2018. Thermodynamic  
558 analysis of computed pathways integrated into the metabolic networks of *E. coli*  
559 and *Synechocystis* reveals contrasting expansion potential. *Metab. Eng.* 45,  
560 223-236.
- 561 Baltazar Reynafarje, Lidia E. Costa, and Lehninger, A.L., 1985. O<sub>2</sub> Solubility in  
562 Aqueous Media Determined by a Kinetic Method. *Anal. Biochem.* 145, 406-418.
- 563 Beg, Q.K., Vazquez, A., Ernst, J., de Menezes, M.A., Bar-Joseph, Z., Barabasi, A.L.,  
564 and Oltvai, Z.N., 2007. Intracellular crowding defines the mode and sequence of  
565 substrate uptake by *Escherichia coli* and constrains its metabolic activity. *Proc.*  
566 *Natl. Acad. Sci. USA* 104, 12663-12668.
- 567 Bekiaris, P.S., and Klamt, S., 2020. Automatic construction of metabolic models with

568 enzyme constraints. *BMC Bioinformatics* 21, 19.

569 Bennett, B.D., Kimball, E.H., Gao, M., Osterhout, R., Van Dien, S.J., and Rabinowitz,  
570 J.D., 2009. Absolute metabolite concentrations and implied enzyme active site  
571 occupancy in *Escherichia coli*. *Nat. Chem. Biol.* 5, 593-599.

572 Bordbar, A., Monk, J.M., King, Z.A., and Palsson, B.O., 2014. Constraint-based  
573 models predict metabolic and associated cellular functions. *Nat. Rev. Genet.* 15,  
574 107-120.

575 Bremer H, and P, D.P., 1996. Modulation of chemical composition and other  
576 parameters of the cell by growth rate. *Washington, DC: American Society for*  
577 *Microbiology*, 1553–1569.

578 Chen, Y., and Nielsen, J., 2019. Energy metabolism controls phenotypes by protein  
579 efficiency and allocation. *Proc. Natl. Acad. Sci. USA* 116, 17592-17597.

580 Dash, S., Olson, D.G., Joshua Chan, S.H., Amador-Noguez, D., Lynd, L.R., and  
581 Maranas, C.D., 2019. Thermodynamic analysis of the pathway for ethanol  
582 production from cellobiose in *Clostridium thermocellum*. *Metab. Eng.* 55, 161-169.

583 Du, B., Zielinski, D.C., and Palsson, B.O., 2018. Estimating Metabolic Equilibrium  
584 Constants: Progress and Future Challenges. *Trends Biochem. Sci.* 43, 960-969.

585 Flamholz, A., Noor, E., Bar-Even, A., and Milo, R., 2012. eQuilibrator—the  
586 biochemical thermodynamics calculator. *Nucleic Acids Res.* 40, D770-775.

587 Goldberg, R.N., Tewari, Y.B., and Bhat, T.N., 2004. Thermodynamics of  
588 enzyme-catalyzed reactions - a database for quantitative biochemistry.  
589 *Bioinformatics* 20, 2874-2877.

590 Guillou, F., Liao, M., Garcia-Espana, A., and Lusty, C.J., 1992. Mutational analysis of  
591 carbamyl phosphate synthetase. Substitution of Glu841 leads to loss of functional  
592 coupling between the two catalytic domains of the synthetase subunit. *Biochem.* 31,  
593 1656-1664.

594 Gurobi Optimization, and LLC, 2020. Gurobi Optimizer Reference Manual. URL:  
595 <http://www.gurobi.com>.

596 Hadicke, O., von Kamp, A., Aydogan, T., and Klamt, S., 2018. OptMDFpathway:  
597 Identification of metabolic pathways with maximal thermodynamic driving force

598 and its application for analyzing the endogenous CO<sub>2</sub> fixation potential of  
599 *Escherichia coli*. *PLoS Comput. Biol.* 14, e1006492.

600 Hart, W.E., Laird, C.D., Watson, J.-P., Woodruff, D.L., Hackebeil, G.A., Nicholson,  
601 B.L., and Siirola, J.D., 2017. Pyomo — Optimization Modeling in Python. second  
602 ed. Springer, Cham, Switzerland.

603 Hart, W.E., Watson, J.-P., and Woodruff, D.L., 2011. Pyomo: modeling and solving  
604 mathematical programs in Python. *Math. Program. Comput.* 3, 219-260.

605 He, H., Hoper, R., Dodenhoft, M., Marliere, P., and Bar-Even, A., 2020. An optimized  
606 methanol assimilation pathway relying on promiscuous formaldehyde-condensing  
607 aldolases in *E. coli*. *Metab. Eng.* 60, 1-13.

608 Heckmann, D., Lloyd, C.J., Mih, N., Ha, Y., Zielinski, D.C., Haiman, Z.B., Desouki,  
609 A.A., Lercher, M.J., and Palsson, B.O., 2018. Machine learning applied to enzyme  
610 turnover numbers reveals protein structural correlates and improves metabolic  
611 models. *Nat. Commun.* 9, 5252.

612 Henry, C.S., Broadbelt, L.J., and Hatzimanikatis, V., 2007. Thermodynamics-based  
613 metabolic flux analysis. *Biophys. J.* 92, 1792-1805.

614 Karp, P.D., Ong, W.K., Paley, S., Billington, R., Caspi, R., Fulcher, C., Kothari, A.,  
615 Krummenacker, M., Latendresse, M., Midford, P.E., et al., 2018. The EcoCyc  
616 Database. *EcoSal Plus* 8.

617 Kim, T.Y., Sohn, S.B., Kim, Y.B., Kim, W.J., and Lee, S.Y., 2012. Recent advances in  
618 reconstruction and applications of genome-scale metabolic models. *Curr. Opin.*  
619 *Biotechnol.* 23, 617-623.

620 Lloyd, C.J., Ebrahim, A., Yang, L., King, Z.A., Catoiu, E., O'Brien, E.J., Liu, J.K.,  
621 and Palsson, B.O., 2018. COBRAme: A computational framework for  
622 genome-scale models of metabolism and gene expression. *PLoS Comput. Biol.* 14,  
623 e1006302.

624 Liu, J.K., O'Brien, E.J., Lerman, J.A., Zengler, K., Palsson, B.O., and Feist, A.M.,  
625 2014. Reconstruction and modeling protein translocation and compartmentalization  
626 in *Escherichia coli* at the genome-scale. *BMC Syst. Biol.* 8, 110.

627 Massaiu, I., Pasotti, L., Sonnenschein, N., Rama, E., Cavaletti, M., Magni, P., Calvio,



- 628 C., and Herrgard, M.J., 2019. Integration of enzymatic data in *Bacillus subtilis*  
629 genome-scale metabolic model improves phenotype predictions and enables in  
630 silico design of poly-gamma-glutamic acid production strains. *Microb. Cell Fact.*  
631 18, 3.
- 632 Mavrovouniotis, M.L., 1993. Identification of localized and distributed bottlenecks in  
633 metabolic pathways. *ISMB*, 273–283.
- 634 Molenaar, D., van Berlo, R., de Ridder, D., and Teusink, B., 2009. Shifts in growth  
635 strategies reflect tradeoffs in cellular economics. *Mol. Syst. Biol.* 5, 323.
- 636 Monk, J.M., Lloyd, C.J., Brunk, E., Mih, N., Sastry, A., King, Z., Takeuchi, R.,  
637 Nomura, W., Zhang, Z., Mori, H., et al., 2017. iML1515, a knowledgebase that  
638 computes *Escherichia coli* traits. *Nat. Biotechnol.* 35, 904-908.
- 639 Murphy, M.P., 2009. How mitochondria produce reactive oxygen species. *Biochem. J.*  
640 417, 1-13.
- 641 Noor, E., Bar-Even, A., Flamholz, A., Lubling, Y., Davidi, D., and Milo, R., 2012. An  
642 integrated open framework for thermodynamics of reactions that combines  
643 accuracy and coverage. *Bioinformatics* 28, 2037-2044.
- 644 Noor, E., Bar-Even, A., Flamholz, A., Reznik, E., Liebermeister, W., and Milo, R.,  
645 2014. Pathway thermodynamics highlights kinetic obstacles in central metabolism.  
646 *PLoS Comput. Biol.* 10, e1003483.
- 647 Orth, J.D., Thiele, I., and Palsson, B.O., 2010. What is flux balance analysis? *Nat.*  
648 *Biotechnol.* 28, 245-248.
- 649 Salvy, P., Fengos, G., Ataman, M., Pathier, T., Soh, K.C., and Hatzimanikatis, V., 2019.  
650 pyTFA and matTFA: a Python package and a Matlab toolbox for  
651 Thermodynamics-based Flux Analysis. *Bioinformatics* 35, 167-169.
- 652 Salvy, P., and Hatzimanikatis, V., 2020. The ETFL formulation allows multi-omics  
653 integration in thermodynamics-compliant metabolism and expression models. *Nat.*  
654 *Commun.* 11, 30.
- 655 Sanchez, B.J., Zhang, C., Nilsson, A., Lahtvee, P.J., Kerkhoven, E.J., and Nielsen, J.,  
656 2017. Improving the phenotype predictions of a *yeast* genome-scale metabolic  
657 model by incorporating enzymatic constraints. *Mol. Syst. Biol.* 13, 935.

- 658 Soh, K.C., and Hatzimanikatis, V., 2010. Network thermodynamics in the  
659 post-genomic era. *Current Opinion in Microbiology* 13, 350-357.
- 660 Trondle, J., Schoppel, K., Bleidt, A., Trachtmann, N., Sprenger, G.A., and  
661 Weuster-Botz, D., 2020. Metabolic control analysis of L-tryptophan production  
662 with *Escherichia coli* based on data from short-term perturbation experiments. *J*  
663 *Biotechnol* 307, 15-28.
- 664 Trudeau, D.L., Edlich-Muth, C., Zarzycki, J., Scheffen, M., Goldsmith, M.,  
665 Khersonsky, O., Avizemer, Z., Fleishman, S.J., Cotton, C.A.R., Erb, T.J., et al.,  
666 2018. Design and in vitro realization of carbon-conserving photorespiration. *Proc*  
667 *Natl Acad Sci U S A* 115, E11455-E11464.
- 668 Vogel, H.J., and McLellan, W.L., 1970. [24b] N-acetyl- $\gamma$ -glutamokinase (*Escherichia*  
669 *coli*. In *Methods in Enzymology* (Academic Press), pp. 251-255.
- 670 Wang, M., Weiss, M., Simonovic, M., Haertinger, G., Schrimpf, S.P., Hengartner,  
671 M.O., and von Mering, C., 2012. PaxDb, a database of protein abundance averages  
672 across all three domains of life. *Mol Cell Proteomics* 11, 492-500.
- 673 Yang, L., Yurkovich, J.T., King, Z.A., and Palsson, B.O., 2018. Modeling the  
674 multi-scale mechanisms of macromolecular resource allocation. *Curr Opin*  
675 *Microbiol* 45, 8-15.
- 676 Yang, X., Yuan, Q., Luo, H., Li, F., Mao, Y., Zhao, X., Du, J., Li, P., Ju, X., Zheng, Y.,  
677 et al., 2019. Systematic design and in vitro validation of novel one-carbon  
678 assimilation pathways. *Metab Eng*.
- 679 Yuan, Q., Huang, T., Li, P., Hao, T., Li, F., Ma, H., Wang, Z., Zhao, X., Chen, T., and  
680 Goryanin, I., 2017. Pathway-Consensus Approach to Metabolic Network  
681 Reconstruction for *Pseudomonas putida* KT2440 by Systematic Comparison of  
682 Published Models. *PLoS One* 12, e0169437.
- 683 Zhang, W., Zhang, M., Gao, C., Zhang, Y., Ge, Y., Guo, S., Guo, X., Zhou, Z., Liu, Q.,  
684 Zhang, Y., et al., 2017. Coupling between d-3-phosphoglycerate dehydrogenase and  
685 d-2-hydroxyglutarate dehydrogenase drives bacterial l-serine synthesis. *Proc Natl*  
686 *Acad Sci U S A* 114, E7574-E7582.
- 687 Zheng, Y., Yuan, Q., Yang, X., and Ma, H., 2017. Engineering *Escherichia coli* for

688 poly-(3-hydroxybutyrate) production guided by genome-scale metabolic network  
689 analysis. *Enzyme Microb Technol* 106, 60-66.
